# Supplementary material
Source: Springer Nature journal article supplement (https://www.springermedizin.de/resource/supplementary/13011_2014_316_MOESM1_ESM.pdf/9628854)

### Average number of days of non-medical prescription opioid use by consumption levels of prescription opioids

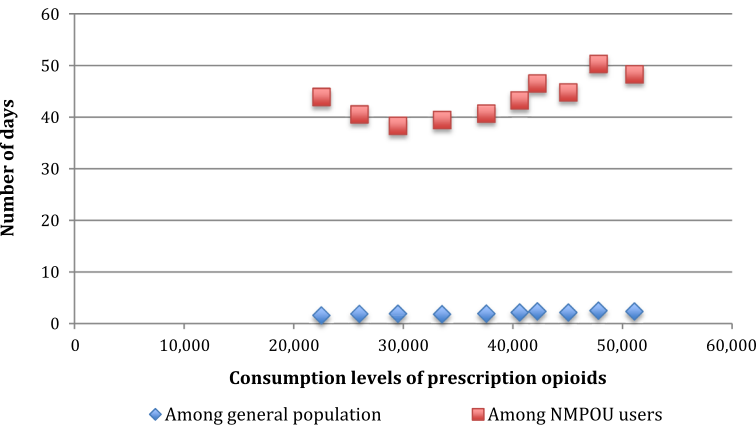

### Prevalence of non-medical prescription opioid use by consumption levels of prescription opioids

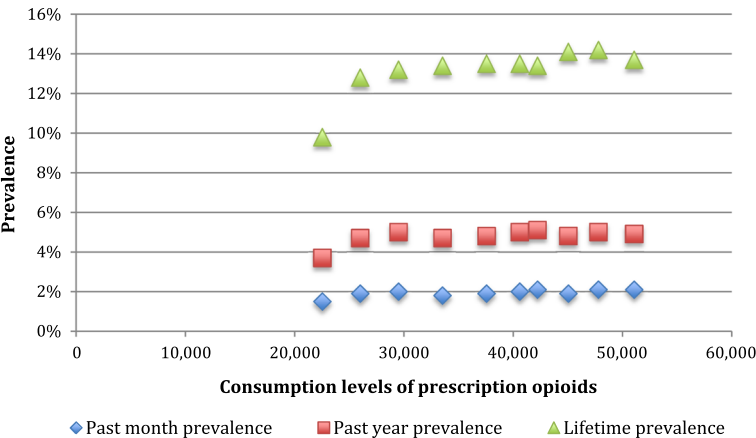

Supplement: MOESM1 [file 9628854]
